# Supplementary material for: Molecular Basis of a Dominant SARS-CoV-2 Spike-Derived Epitope Presented by HLA-A*02:01 Recognised by a Public TCR
Source: MDPI journal article supplement (doi:10.3390/cells10102646), 2021-10-03
Supplement: s1 [file s1]

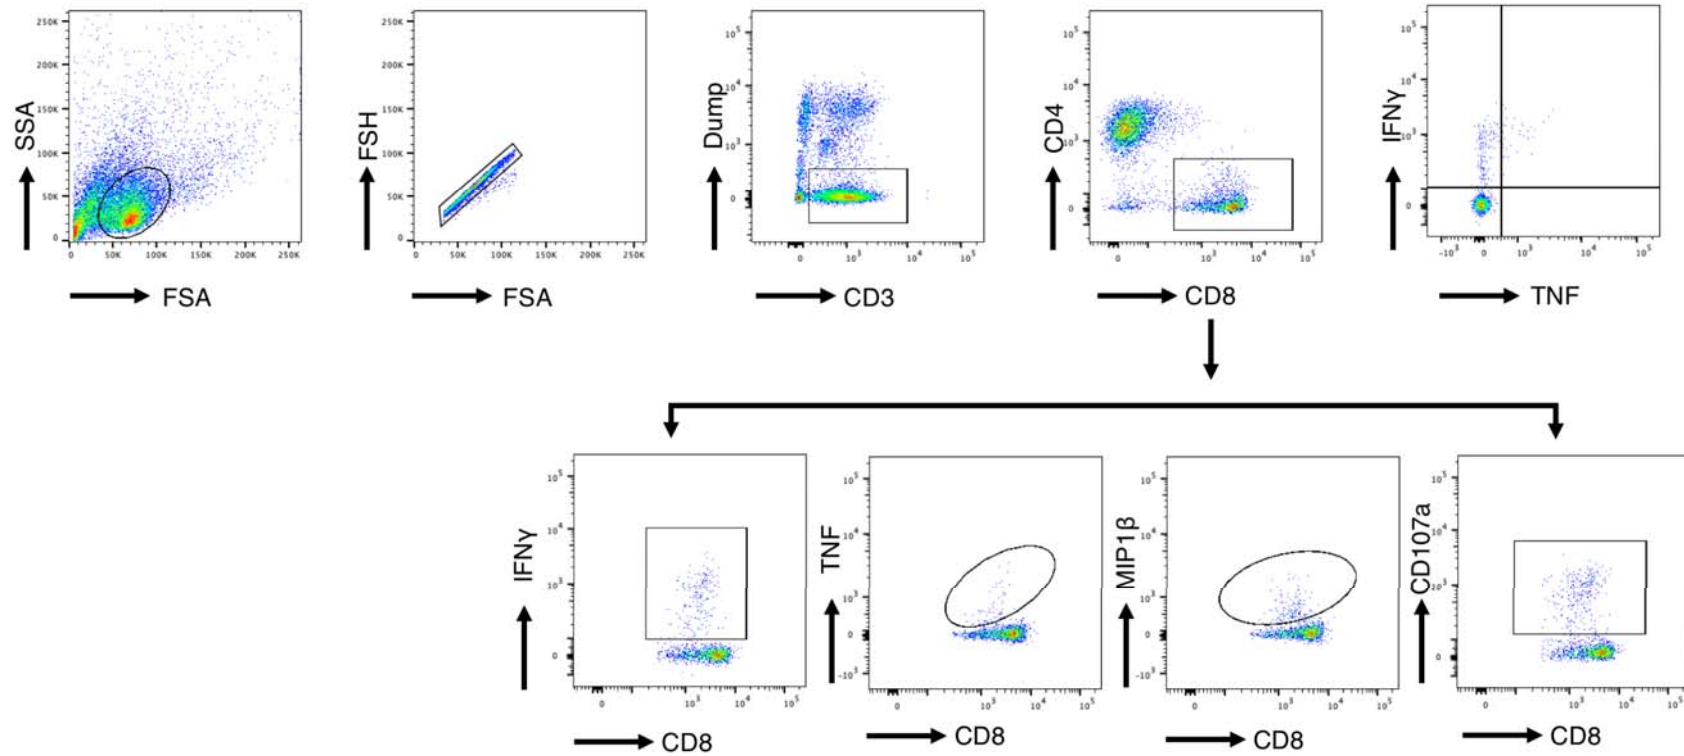

**Figure S1.** Gating strategy used in this study. **(Top)** Gating strategy used to assess the functional responses of CD8+ T cell lines. Cells were gated on lymphocytes, singlets, CD3+Live cells, CD8+CD4- T cells to observe IFN $\gamma$  and TNF production. **(Bottom)** Gating strategy used to assess the polyfunctional responses of CD8+ T cell lines. Cells were gated on lymphocytes, singlets, CD3+Live cells, CD8+CD4- T cells and each of CD8+IFN $\gamma$ +, CD8+TNF+, CD8+MIP1 $\beta$  and CD8+CD107a.
